# Supplementary material
Source: publisher site journal article supplement (https://neobiota.pensoft.net/article/21470/download/suppl/33/)
Supplement: Supplementary file 1

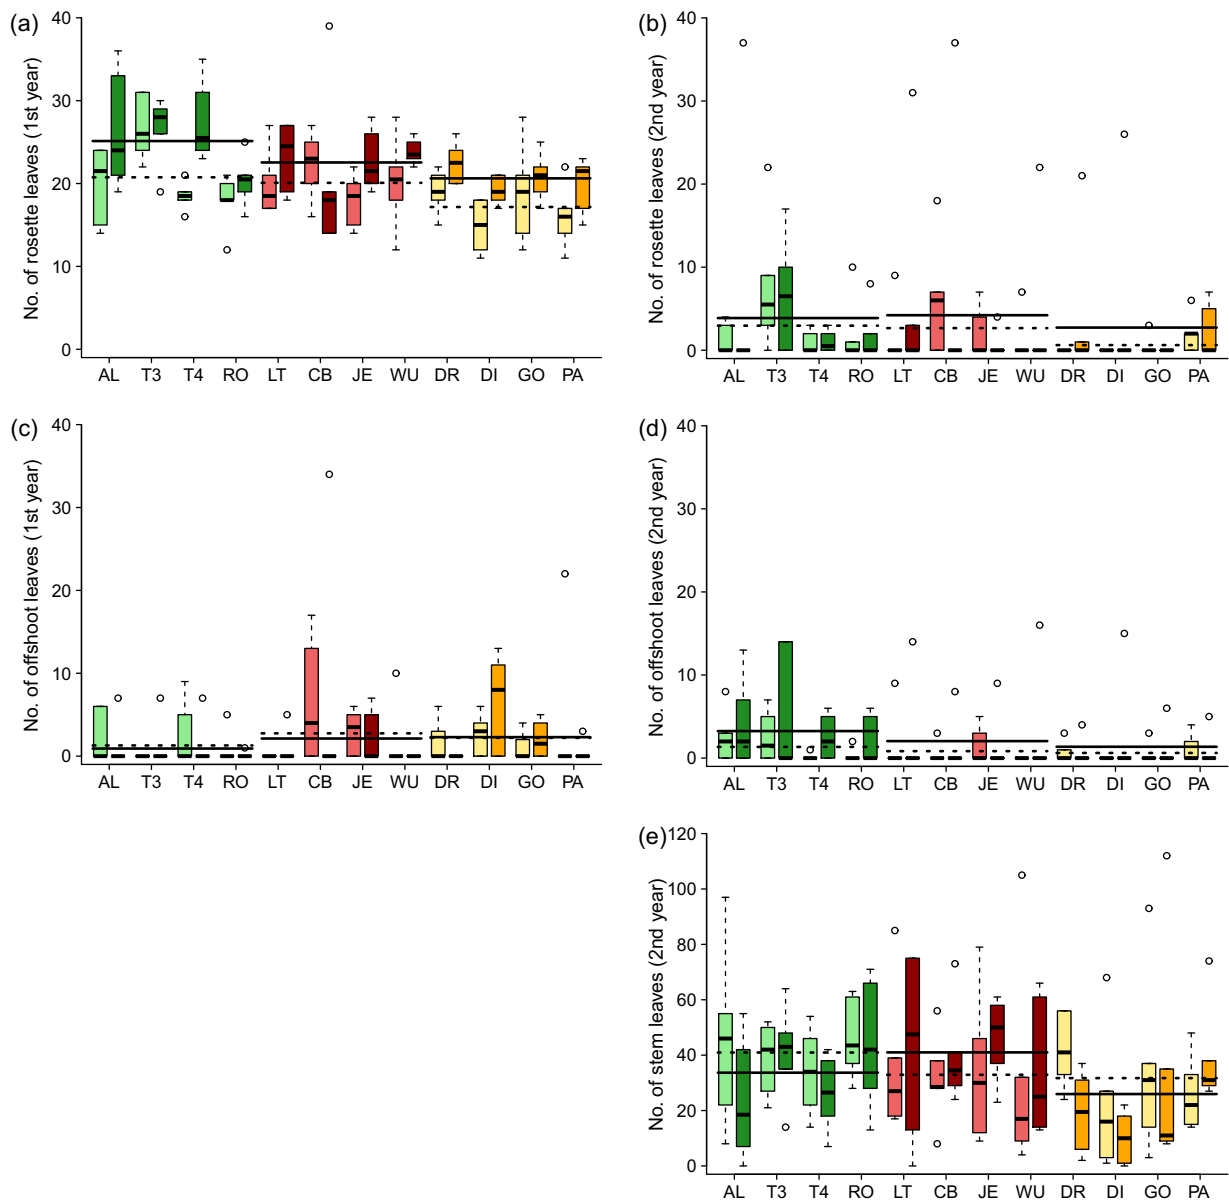

**Figure S2.** Growth traits of *Bunias orientalis* plants. Twelve populations of native (green), invasive (red), and naturalised (yellow) status were grown in a field common garden under two nitrate-fertilisation treatments, low (light shade) and high (dark shade) ( $n = 5-6$  per population and fertilisation treatment; for population codes see Table 1). Number of (a) rosette and (c) offshoot leaves per plant in the first year. Number of (b) rosette, (d) offshoot, and (e) stem leaves per plant in the second year. Box plots: median, 5th, 25th, 75th, 95th percentiles; open dots: outliers. Lines along four populations of identical status: status mean values for low (dashed) and high (solid) fertilisation treatments.
